# Supplementary figures and images for: Effect of Nitrogen on Growth and Optical Properties of Single-Crystal Diamond Synthesized by Chemical Vapor Deposition
Source: MDPI journal article supplement (doi:10.3390/ma17061311), 2024-03-12

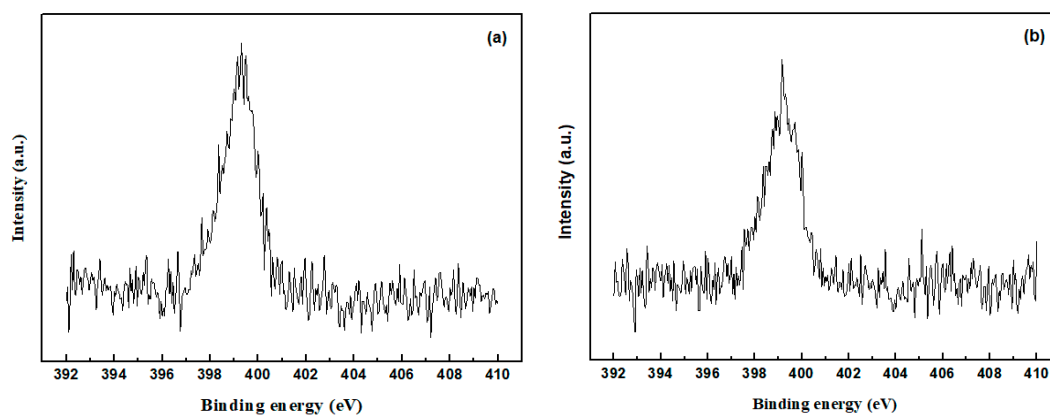

**Figure S1.** XPS N1s spectra of synthesized SCDs with (a) 0% and (b) 0.8% N<sub>2</sub> addition.

Supplement: s1 [file s1]
